# Supplementary material
Source: HighWire-hosted journal article supplement (https://tsaco.smart01.highwire.org/content/9/1/e001398)
Supplement: inline-supplementary-material-1 [file inline-supplementary-material-1.pdf]

Short Title: VTE Prophylaxis is Inadequate

### **VTE Prophylaxis Administration in Trauma Patients: We Are Still Behind the Eight Ball**

Amanda L. Teichman, MD, FACS<sup>1</sup>, Asanthi Ratnasekera, DO, FACS<sup>2</sup>

<sup>1</sup>Assistant Professor of Surgery, Division of Acute Care Surgery, Rutgers Robert Wood Johnson Medical School, 125 Paterson Street, Suite 6300, New Brunswick, New Jersey, USA

<sup>2</sup>Clinical Assistant Professor of Surgery, Drexel University College of Medicine, Christiana Care, Newark, DE

**Corresponding Author:**

Amanda L. Teichman, MD, FACS  
Assistant Professor of Surgery  
Department of Surgery, Division of Acute Care Surgery  
Rutgers Robert Wood Johnson Medical School  
125 Paterson Street, Suite 6300  
New Brunswick, NJ 08901  
P: 732-235-7766, F: 732-235-2964  
[ateich13@rwjms.rutgers.edu](mailto:ateich13@rwjms.rutgers.edu)  
ORCID ID: 0000-0003-4120-8345

**Disclosures/Conflict of Interest:**

The authors have none to report

**E-mail Addresses:**

AT: [ateich13@rwjms.rutgers.edu](mailto:ateich13@rwjms.rutgers.edu)  
AR: [ashanthi27@hotmail.com](mailto:ashanthi27@hotmail.com)

**Word Count:**

400
